1 **Novel Compensatory Mechanisms Enable the Mutant KCNT1 Channels to Induce**  
2 **Seizures**

3 Salleh N. Ehaideb<sup>1,2#,\*</sup>, Gentry T. Decker<sup>1\*</sup>, Petrina Smith<sup>1</sup>, Daniel Davis<sup>3</sup>, Bing Zhang<sup>1@</sup>

4

5 <sup>1</sup> Division of Biological Sciences, University of Missouri, Columbia, MO

6 <sup>2</sup> King Abdullah International Medical Research Center, Department of Medical

7 Genomic Research, Riyadh, Saudi Arabia

8 <sup>3</sup> Animal Modeling Core, University of Missouri, Columbia, MO

9

10 \*These authors contributed equally to this work.

11 @To whom correspondence should be addressed ([zhangbing@missouri.edu](mailto:zhangbing@missouri.edu))

12

13 Words in Abstract: **150**

14 Words in main text: **3419**

15 Words in Introduction: **519**

16 Words in Figure legends: **821**

17

18 **Abstract:**

19

20 Mutations in the sodium-activated potassium channel (KCNT1) gene are linked to  
21 epilepsy. Surprisingly, all KCNT1 mutations examined to date increase K<sup>+</sup> current  
22 amplitude. These findings present a major neurophysiological paradox: how do gain-of-  
23 function KCNT1 mutations expected to silence neurons cause epilepsy? Here, we use  
24 *Drosophila* to show that expressing mutant KCNT1 in GABAergic neurons leads to  
25 seizures, consistent with the notion that silencing inhibitory neurons tips the balance  
26 towards hyperexcitation. Unexpectedly, mutant KCNT1 expressed in motoneurons also  
27 causes seizures. One striking observation is that mutant KCNT1 causes abnormally  
28 large and spontaneous EJPs (sEJPs). Our data suggest that these sEJPs result from  
29 local depolarization of synaptic terminals due to a reduction in Shaker channel levels  
30 and more active Na<sup>+</sup> channels. Hence, we provide the first *in vivo* evidence that both  
31 disinhibition of inhibitory neurons and compensatory plasticity in motoneurons can  
32 account for the paradoxical effects of gain-of-function mutant KCNT1 in epilepsy.

33

34

35

36

37

38

39

40

41

## 42 **Introduction**

43

44 Ion channels, such as potassium ( $K^+$ ), sodium ( $Na^+$ ), and calcium ( $Ca^{2+}$ )  
45 channels, play important roles in neuronal excitability via regulation of the resting  
46 potential, the amplitude and the duration of action potentials (APs), the firing rates or  
47 patterns of APs, and synaptic transmission. Mutations in voltage-gated cation channels  
48 ( $Na^+$ ,  $Ca^{2+}$ , and  $K^+$ ) that result in neuronal hyper-excitability are often linked to epilepsy<sup>1-</sup>  
49 <sup>3</sup>. One of the distinct exceptions is the sodium-activated potassium channel (KCNT1,  
50 also called *Slack* or *Slo2.2*), which is encoded by the KCNT1 gene and unique in that  
51 they are activated by intracellular  $Na^+$  and  $Cl^-$ <sup>4-8</sup>. At least 24 point mutations have been  
52 found in the human *KCNT1* gene in patients with autosomal dominant nocturnal frontal  
53 lobe epilepsy (ADNFLE), malignant migrating partial seizures of infancy (MMIPSI), early  
54 onset epileptic encephalopathy (EOEE), and West syndrome<sup>9-15</sup>. The number of  
55 patients affected by KCNT1 mutations is not known but many of these patients do not  
56 respond well to current anti-epilepsy drugs<sup>13,16-18</sup>.

57 At present, the cellular mechanisms of KCNT1-related epilepsy remain poorly  
58 understood. Electrophysiological studies using heterologous expression systems such  
59 as the *Xenopus* oocytes or Chinese hamster ovary (CHO) cells have shown that all of  
60 the mutant KCNT1 channels studied to date significantly increase the magnitude of  $K^+$   
61 currents<sup>9,11,12,19</sup>. These findings are important but they present an interesting  
62 neurophysiological conundrum in that increased  $K^+$  currents are expected to  
63 hyperpolarize or silence neurons and reduce the possibility for neurons to fire APs, a  
64 condition paradoxically unfavorable of triggering seizure or epilepsy.

65 Two different hypotheses have been proposed to explain this puzzle. The  
66 'repolarization hypothesis'<sup>5,20-23</sup> states that increased Na<sup>+</sup>-dependent K<sup>+</sup> currents might  
67 accelerate the rate of AP repolarization, thus enhancing the firing rate. Studies of  
68 KCNT1 KO mice showed, however, that the lack of the KCNT1 K<sup>+</sup> current sped up  
69 repolarization and enhanced AP firing<sup>24</sup>. This result is not in agreement with the  
70 'repolarization hypothesis', suggesting that KCNT1 K<sup>+</sup> current hinders repetitive firing  
71 normally. Another hypothesis is the 'disinhibition hypothesis'<sup>19</sup>, which states that  
72 increased K<sup>+</sup> currents in inhibitory interneurons reduce GABA release and consequently  
73 cause hyperexcitability of postsynaptic neurons. This hypothesis is plausible; however,  
74 it has not been tested directly.

75 To test the disinhibition hypothesis and to discover new *in vivo* function of mutant  
76 KCNT1, we generated a fruit fly model of human mutant KCNT1. Our data show that  
77 expression of the mutant KCNT1 channels in GABAergic interneurons indeed causes  
78 bang-sensitive seizures in flies, the first *in vivo* observation in support of the disinhibition  
79 hypothesis. To our surprise, however, expression of the mutant channels in  
80 motoneurons results in uncoordinated larval locomotion, enhanced synaptic  
81 transmission, and also bang-sensitive seizures in adult flies. These results suggest that  
82 neuronal excitability is enhanced rather than reduced in motoneurons by the mutant  
83 KCNT1. We further show that neuronal hyperexcitability is achieved in part by a  
84 compensatory downregulation of endogenous *Drosophila* K<sup>+</sup> channels such as Shaker  
85 and enhancement of voltage-gated Na<sup>+</sup> channels, in an attempt to counter balance the  
86 effect of increased KCNT1 K<sup>+</sup> current. Hence, our study supports two complementary  
87 hypotheses, the 'disinhibition hypothesis' and a new 'compensatory plasticity

88 hypothesis', to help better understand the neurobiology underlying KCNT1-associated  
89 epilepsy.

90

## 91 **Results**

### 92 **Mutant hKCNT1 channels increase K<sup>+</sup> conductance in muscles**

93 To date, nearly all electrophysiological studies of mutant KCNT1 channels  
94 associated with epilepsy have been conducted in heterologous expression systems,  
95 such as the *Xenopus* oocytes or CHO cells<sup>9,11,12,19</sup>. These studies show that mutant  
96 hKCNT1 channels display a significant increase in K<sup>+</sup> current magnitude compared to  
97 control<sup>9,11,12,19</sup>. To determine whether hKCNT1 mutations also exhibit gain-of-function  
98 (an increase in K<sup>+</sup> conductance) phenotypes *in vivo*, we used the *GAL4/UAS* system to  
99 overexpress wild type (WT) human KCNT1 (hKCNT1) and two mutants, G288S (a point  
100 mutation in S5; next to the channel pore) and R928C (a point mutation near the NAD<sup>+</sup>  
101 domain) (Suppl Fig. 1a). Our data show that the resting potential is significantly  
102 hyperpolarized and the input resistance dramatically reduced in muscles expressing  
103 either G288S or R928C *hKCNT1* mutations by *Mhc-GAL4* (Suppl Fig. 1b-e). The  
104 *hKCNT1* mutant larvae were not able to crawl very far from its starting point and for the  
105 most part of the recording period the larvae were stationary and inactive (Suppl Movie 1  
106 and Suppl Fig. 2). These results are similar to the effects of human inward-rectifier  
107 potassium channel 2.1 (*Kir2.1*)<sup>25</sup> expressed in muscles (Suppl Fig. 1b-e). Thus, our *in*  
108 *vivo* data illustrate that *hKCNT1* G288S and R928C mutations are gain-of-function  
109 resulting in an increase in K<sup>+</sup> conductance, and subsequently leading to impaired larvae  
110 locomotion activities, hyperpolarized resting potential, and lower muscle resistance.

111 **Mutant KCNT1 causes seizures in adult flies**

112           Epilepsy is neurological disease defined as involuntary muscle convulsions  
113 resulting in seizures. Drosophilists have been using adult flies to determine the genetic  
114 bases of epilepsy and whether a particular mutation will predispose the flies to seizures.  
115 Several behavior and electrophysiological techniques have been developed to assess  
116 seizures in adult flies<sup>26-28</sup>. The bang-sensitivity behavioral assay is used to determine  
117 whether subjecting flies to mechanical stimulation can elicit seizure activities<sup>29,30</sup>.

118           To directly test the disinhibition hypothesis, we expressed the mutant and  
119 wildtype human KCNT1 in GABAergic neurons using a cell-specific *Gal4*, *Gad-Gal4*<sup>31</sup>.  
120 Adult flies were then subjected to the bang-sensitive test in which the flies were placed  
121 in an empty fly vial, vortexed for 20 sec, and then observed for seizing behavior (often  
122 flip on their backs and unable to stand up or buzz around for at least one second). We  
123 noted that the flies expressing mutant R928C in GABAergic neurons had a higher  
124 propensity to display seizure (Fig. 1a-e; Suppl Movie 2). The frequency of seizures is  
125 significantly higher and duration significantly longer compared to the two control groups  
126 (*Gad-Gal4 >WT*; *Gad-Gal4 > WT human KCNT1*). The mean seizing frequency is 26%  
127 compared to the controls (10%, 5%, respectively). The mean seizing duration of these  
128 flies is significantly longer ( $p < 0.01$ ), averaging 28 Sec compared to 2 sec and 1.5 sec in  
129 *Gad-Gal4 >WT* and *Gad-Gal4 >WT human KCNT1*, respectively. These results support  
130 the 'disinhibition hypothesis', indicating that silencing inhibitory neurons tips the balance  
131 towards excitation and thus implicating a role for GABAergic neurons in epileptogenesis  
132 in human patients.

133 We were also curious about whether expression of the mutant KCNT1 channels  
134 in motoneurons would have a similar effect as they did in GABAergic neurons. In  
135 motoneurons mutant KCNT1 driven by *D42-Gal4*<sup>32,33</sup> causes embryonic lethality at 25  
136 °C, consistent with the silencing effect of enhanced K<sup>+</sup> current and pan neuronal  
137 expression of D42 in early embryos. To overcome this obstacle, we used *GAL80*<sup>ts 34</sup>  
138 (this form of *GAL80* become inactive when flies are reared at higher temperature) in the  
139 context of the *D42, UAS hKCNT1* mutation to prevent the expression of hKCNT1  
140 channels during development. Flies were kept at 18 °C until eclosion, then adult flies  
141 were collected and kept at 25 °C to age, allowing the expression of hKCNT1 mutant  
142 channels in adult flies. Mechanical stimulation of flies expressing R928C mutation by  
143 vortexing showed a significant increase in the percentage of seizing flies and seizing  
144 duration ( $25.7 \pm 3.5$  S and  $11.3 \pm 2.1$  S, respectively) compared to *D42/+* ( $1.25 \pm 0.9$  S  
145 and 1 S, respectively) and *D42/hKCNT1* ( $0.7 \pm 0.7$  S and 1 S, respectively, Fig. 1f-j and  
146 Suppl Movie 3). These data suggest a new mode by which mutant hKCNT1 channels  
147 cause seizure and epilepsy.

148

149

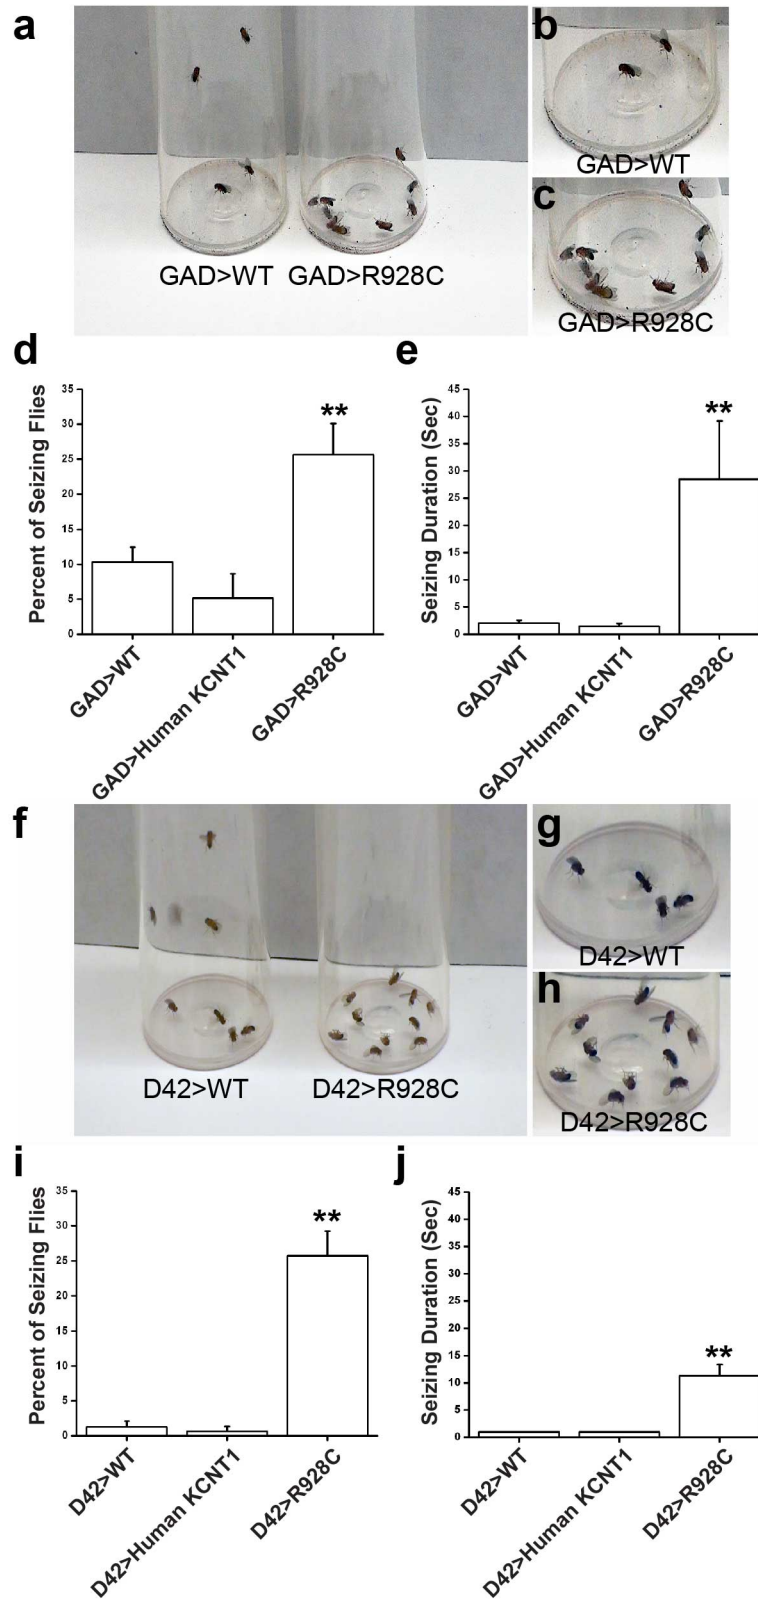



151

**Figure 1: Neuronal expression of mutant hKCNT1 channel leads to seizures in adult flies.**

(a, f) Representative image of flies after twenty seconds of mechanical stimulation (vortexing). Close-up images of the bottom of the vials are shown in (b, c, g, and h). Control flies show no sign of seizure activity after vortexing whereas a large number of mutant KCNT1-expressing flies exhibit seizure. (d and e) GABAergic expression of mutant hKCNT1 channel in adult flies show a significant increase in both number of seizing flies and seizing duration. (i and j) Motoneuron expression of mutant hKCNT1 channel predispose flies to seizure and very few control flies seized after vortex. If control flies seized they did not seize more than one second while flies expressing mutant hKCNT1 channels showed significantly longer seizure durations. At least 120 and 40 flies were tested for Motoneuron and GABAergic expression per genotype. Error bars show S.E.M.  $**P < 0.01$  one-way ANOVA, Turkey HSD *post hoc* test.

152

153 **Mutant hKCNT1 channels do not silence motoneurons but disrupt coordinated**  
154 **crawling and motoneuronal firing**

155 The findings from expressing mutant KCNT1 in muscle, GABAergic neurons, and  
156 motoneurons appear to contradict one another in that muscles and GABAergic neurons  
157 are silenced whereas motoneurons in adult flies are not. In order to better understand  
158 the mechanisms by which mutant KCNT1 in motoneurons causes seizures, we decided  
159 to examine the impact of mutant KCNT1 on larval behavior and physiology. To  
160 overcome the embryonic lethality, we raised the flies with motoneuronal expression of  
161 mutant KCNT1 at 18°C, which reduces the expression levels of the mutant hKCNT1  
162 channels. *D42>G288S* reached pupal stage and few of the *D42>R928C* flies were able  
163 to reach the adult stage. We noted that larvae expressing the mutant KCNT1 channels  
164 showed severe crawling defects compared to control larvae (wildtype or larvae  
165 expressing the wildtype KCNT1) (Suppl Fig. 3a,b; Suppl Movie 4). Because of the  
166 uncoordinated crawling, the pupae became bended (crescent shape, Suppl Fig. 3c).

167 However, after careful observation we noted that unlike muscle expression of mutant  
168 hKCNT1 channels, which were inactive for the most part of the observation, larvae  
169 expressing G288S or R928C in motor neurons showed a strong and active but one  
170 sided larval contractions (Suppl Movie 4). This finding suggests that the reduction in  
171 larvae crawling distance is not due to neuronal inactivity but rather uncoordinated  
172 neuronal firing.

173 Our behavioral observations of both larvae and adults strongly suggest that  
174 neuronal expression of mutant KCNT1 at low levels does not silence motoneurons. On  
175 the contrary, they cause hyperactivity in larvae (see below) and seizures in adult. To  
176 determine the effects of *hKCNT1* mutations on neuronal activity, we utilized the well-  
177 established neuromuscular junction (NMJ) preparation to assess their effects on  
178 synaptic transmission in third-instar larvae<sup>35,36</sup>. Surprisingly, electrical stimulation of the  
179 segmental nerve did not alter the amplitude of excitatory junction potentials (EJPs) of  
180 larvae expressing G288S or R928C mutations in motor neurons compared to control  
181 larvae. The mean EJP amplitude for *D42-GAL4>G288S*, *D42>R928C* was  $49.1 \pm 1.7$   
182 mV and  $49.5 \pm 1.7$  mV, respectively, which were not significantly different from *D42/+*  
183 ( $50.6 \pm 1.1$  mV) and *D42/hKCNT1* ( $49.5 \pm 1.3$  mV) (Fig. 2a,b). In addition, there was no  
184 significant difference in membrane resting potentials between of G288S and R928C  
185 mutations and controls (*D42/+* and *D42/hKCNT1*) (Suppl Fig. 4). These data indicate  
186 that reduction of larval crawling activity caused by motoneuronal expression of mutant  
187 hKCNT1 channels is not due to neuronal silencing but most likely due to inability to  
188 coordinate neuronal firing, which hinders larvae crawling ability.

189           To more directly investigate whether *hKCNT1* mutations compromise  
190 coordinated neuronal firing, we examined ventral nerve cord (VNC) neuronal firing in  
191 third-instar larvae using  $Ca^{2+}$  imaging. Larvae VNC (equivalent to spinal cord in  
192 humans) have eight pairs of abdominal ganglia, each right and left ganglion controls the  
193 corresponding larval body wall segment<sup>37-40</sup>. For example, the first pair of ganglia  
194 control the right and left abdominal muscle segment 1. During larvae crawling the first  
195 pair of ganglia will fire together then the next pair and signal will propagate down until  
196 the last pair fired<sup>37-40</sup>. To visualize ganglia firing we used the calcium sensor *GCaMP6S*  
197 expressed in motoneurons. Larvae expressing WT *hKCNT1* channels showed  
198 coordinated ganglion firing, where right and left ganglia fired simultaneously (Fig 2c,d  
199 and Suppl Movie 5). On the other hand, expression of *hKCNT1* mutated channels  
200 resulted in a significant number of unsynchronized motoneuronal firing, and sometimes  
201 only ganglion in one side fired without the other pair firing at all (Fig. 2c,d,e and Suppl  
202 Movie 5). In addition, oftentimes calcium waves were not able to pass through all  
203 ganglia and usually terminated after reaching the fourth ganglion in larvae expressing  
204 mutant *hKCNT1* channels. However, both larvae expressing WT and mutated *hKCNT1*  
205 channels showed a similar peak amplitude of  $Ca^{2+}$  waves (Fig. 2f). Taken together, our  
206 data on both EJP and calcium waves suggest that *hKCNT1* mutations do not silence  
207 neuronal firing but rather influence firing synchrony.  
208

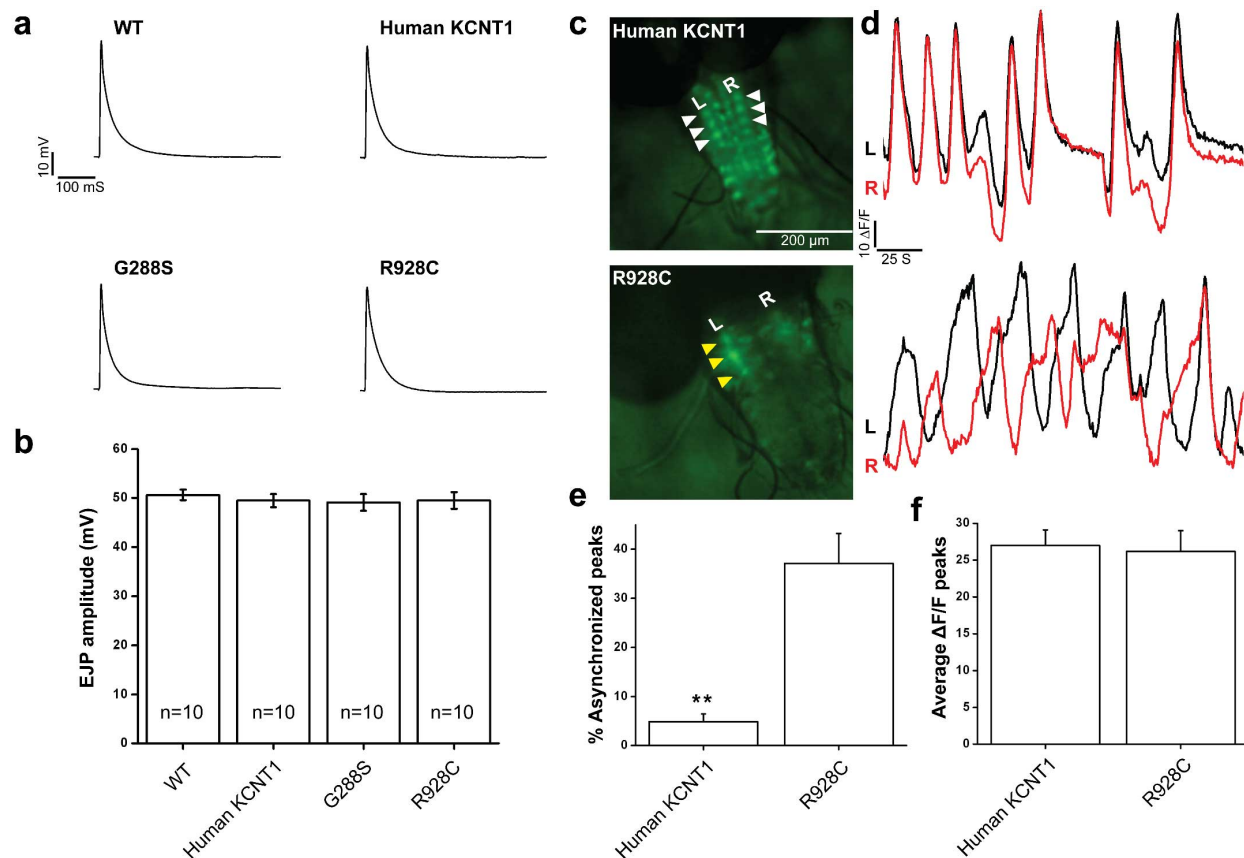

209

210

**Figure 2: Expression of *hKCNT1* mutation did not silence neurons, but caused uncoordinated ventral ganglion firing.**

(a) Representative traces of excitatory junction potential (EJPs) under physiological conditions. (b) Average EJPs amplitude of ten recordings (two per larva) per genotype. Recordings were taken from muscle 6 segment A3 or A4. (c) Representative image of calcium waves in larvae expressing WT *hKCNT1* channels (top) in motor neurons and larvae expressing mutated *hKCNT1* channel (bottom). The calcium waves were visualized using *GCaMP6S* calcium sensor expressed in motoneuron. L and R indicate left and right sides, respectively, of ventral nerve cord (VNC) in third-instar larvae. White and yellow arrow heads indicate coordinated and uncoordinated left and right VNC ganglion firing respectively. (d) Representative calcium waves signals from left and right VNC ganglion pairs, showing coordinated (top) and uncoordinated (bottom) waves in larvae expressing WT and mutated *hKCNT1* channels during active crawling respectively. (e) Quantification of percent of uncoordinated left and right VNC ganglion calcium waves. (f) Quantification of average calcium wave amplitude. Five larvae were used for calcium waves analysis. All larvae were reared at 22 °C for 5 days and 2 days at 25 °C prior to EJP recordings and calcium imaging. Error bars show S.E.M. \*\* $P < 0.01$ , one-way ANOVA, *Student's T test*.

211

212 **Mutant hKCNT1 channels cause large spontaneous postsynaptic potentials at the**  
213 **larval NMJ**

214 Spontaneous miniature excitatory junction potentials (mEJPs or minis) play a role  
215 in synaptic plasticity and function, evoked transmitter release, neuronal excitability, and  
216 postsynaptic membrane resistance<sup>41-45</sup>. It has been shown that in somatostatin cells  
217 taken from epileptic mice exhibit an increase in miniature excitatory postsynaptic  
218 synaptic current (mEPSC) frequency<sup>46</sup>. Thus, we investigated whether *hKCNT1*  
219 mutations alter the mini properties at the NMJ of third-instar larvae. We severed the  
220 segmental nerves posterior to the ventral ganglion and monitored mEJP activity (usually  
221 spontaneous release from single vesicles) at the NMJ.

222 Control larvae (both *D42/+* and *D42/hKCNT1*) displayed typical spontaneous  
223 minis, with an average frequency of 1.4 Hz and amplitude of  $1.7 \pm 0.1$  mV (for both  
224 genotypes). Remarkably, larvae expressing mutant hKCNT1 channels showed very  
225 large spontaneous synaptic potentials, up to 14 mV (Fig. 3a). As shown below, these  
226 large synaptic events are spontaneous EJPs. Hence, we will refer them as spontaneous  
227 EJPs (sEJPs) rather than minis or mEJPs. The average amplitude of spontaneous  
228 synaptic potentials (note that this refers to both minis and sEJPs) in larvae expressing  
229 G288S and R928C mutations was significantly higher ( $2.6 \pm 0.2$  mV and  $3 \pm 0.2$  mV,  
230 respectively, ANOVA,  $P < 0.01$ ). The counts of minis plus sEJPs and their cumulative  
231 probability plots are shifted to the right in larvae expressing mutant hKCNT1 channels,  
232 due to the presence of significantly high number of large sEJPs in these larvae  
233 compared to *D42/+* and *D42/hKCNT1* larvae (Fig. 3b,c).

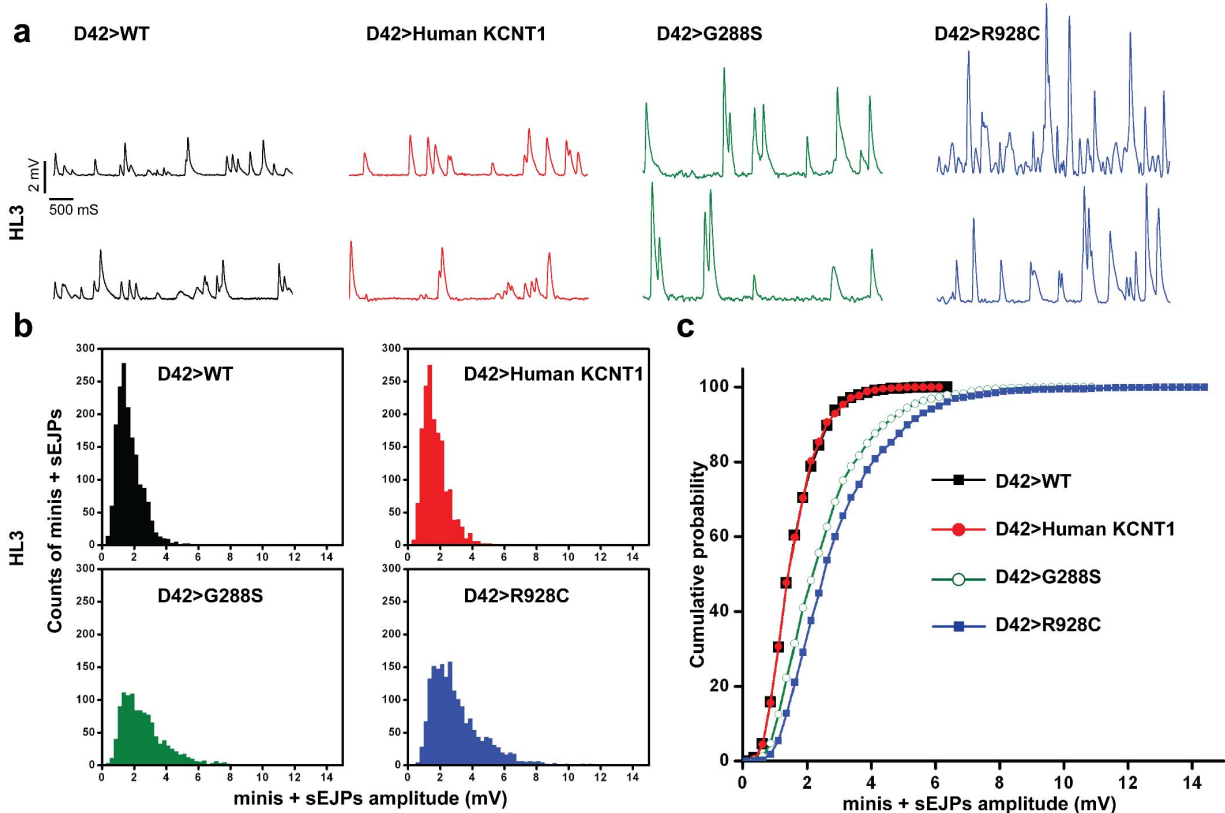

234

**Figure 3: Third-instar larvae expressing *hKCNT1* mutations in motor neurons showed spontaneous EJPs.**

(a) Representative traces of miniature excitatory junction potentials (mEJP or minis) under physiological condition. Both *hKCNT1* mutants show significantly unusually larger spontaneous synaptic events in addition to minis compare to *D42/+* and *D42/hKCNT1* traces. We call these large synaptic potentials spontaneous EJPs (sEJPs). (b) Histograms of spontaneous synaptic potentials (minis plus sEJPs) of the four different genotypes. Synaptic potential counts are sorted into 0.125 mV bins. Note the right-shift distribution of spontaneous synaptic potentials in the two mutant *KCNT1* larvae. (c) Cumulative probability plot of spontaneous synaptic potentials from larvae expressing mutant *hKCNT1* channels illustrate the present of significantly higher number of large sEJPs compare to *D42/+* and *D42/hKCNT1*. Recordings were taken from muscle 6 segment A3 or A4 and all larvae were reared at 22 °C for 5 days and 2 days at 25 °C prior to synaptic recordings. A total of ten recordings (two per larva) were made per genotype.

235

236 These sEJPs are highly unusual as the axons of the motoneurons are cut free

237 from the soma and it is not possible for action potentials to be propagated from the

238 soma. We reasoned that they were caused by local depolarization at the synaptic  
239 terminal. This could be possible only if there was a compensatory enhancement in  
240 voltage-gated cation ( $\text{Na}^+$  or  $\text{Ca}^{2+}$ ) channel levels and activities or a reduction in  $\text{K}^+$   
241 channel levels and activities. To test this hypothesis, we used tetrodotoxin (TTX) to  
242 block voltage-gated sodium channel activity and surprisingly observed that TTX only  
243 reduced the number of 'extremely' large sEJPs ( $>10$  mV) but did not abolish sEJPs in  
244 larvae expressing mutant hKCNT1 channels (Fig. 4a,b,c; Suppl Fig. 5). However, we  
245 noticed a slight decrease in average amplitude of spontaneous synaptic potentials in the  
246 G288S and R928C expressing larvae ( $2.1 \pm 0.1$  mV and  $2.5 \pm 0.2$  mV, respectively,  
247 ANOVA,  $P < 0.01$ ), but TTX had no significant effect on mini amplitude in *D42/+* and  
248 *D42/hKCNT1* larvae ( $1.6 \pm 0.1$  mV and  $1.5 \pm 0.1$  mV, respectively). These data suggest  
249 that there is an upregulation of voltage-gated  $\text{Na}^+$  channels but they are not responsible  
250 for eliciting the sEJPs.

251 We then added the  $\text{Ca}^{2+}$  channel blocker cadmium to the TTX-containing saline  
252 and effectively eliminated the sEJP in the mutant KCNT1-expressing larvae (Fig. 4d,e,f).  
253 On the other hand, no changes in mEJP properties were observed in the *D42/+* and  
254 *D42/hKCNT1* larvae. These results indicate that depolarization of voltage-gated  $\text{Ca}^{2+}$   
255 channels at the NMJ likely results in more transmitter release and gives rise to sEJPs.  
256  
257



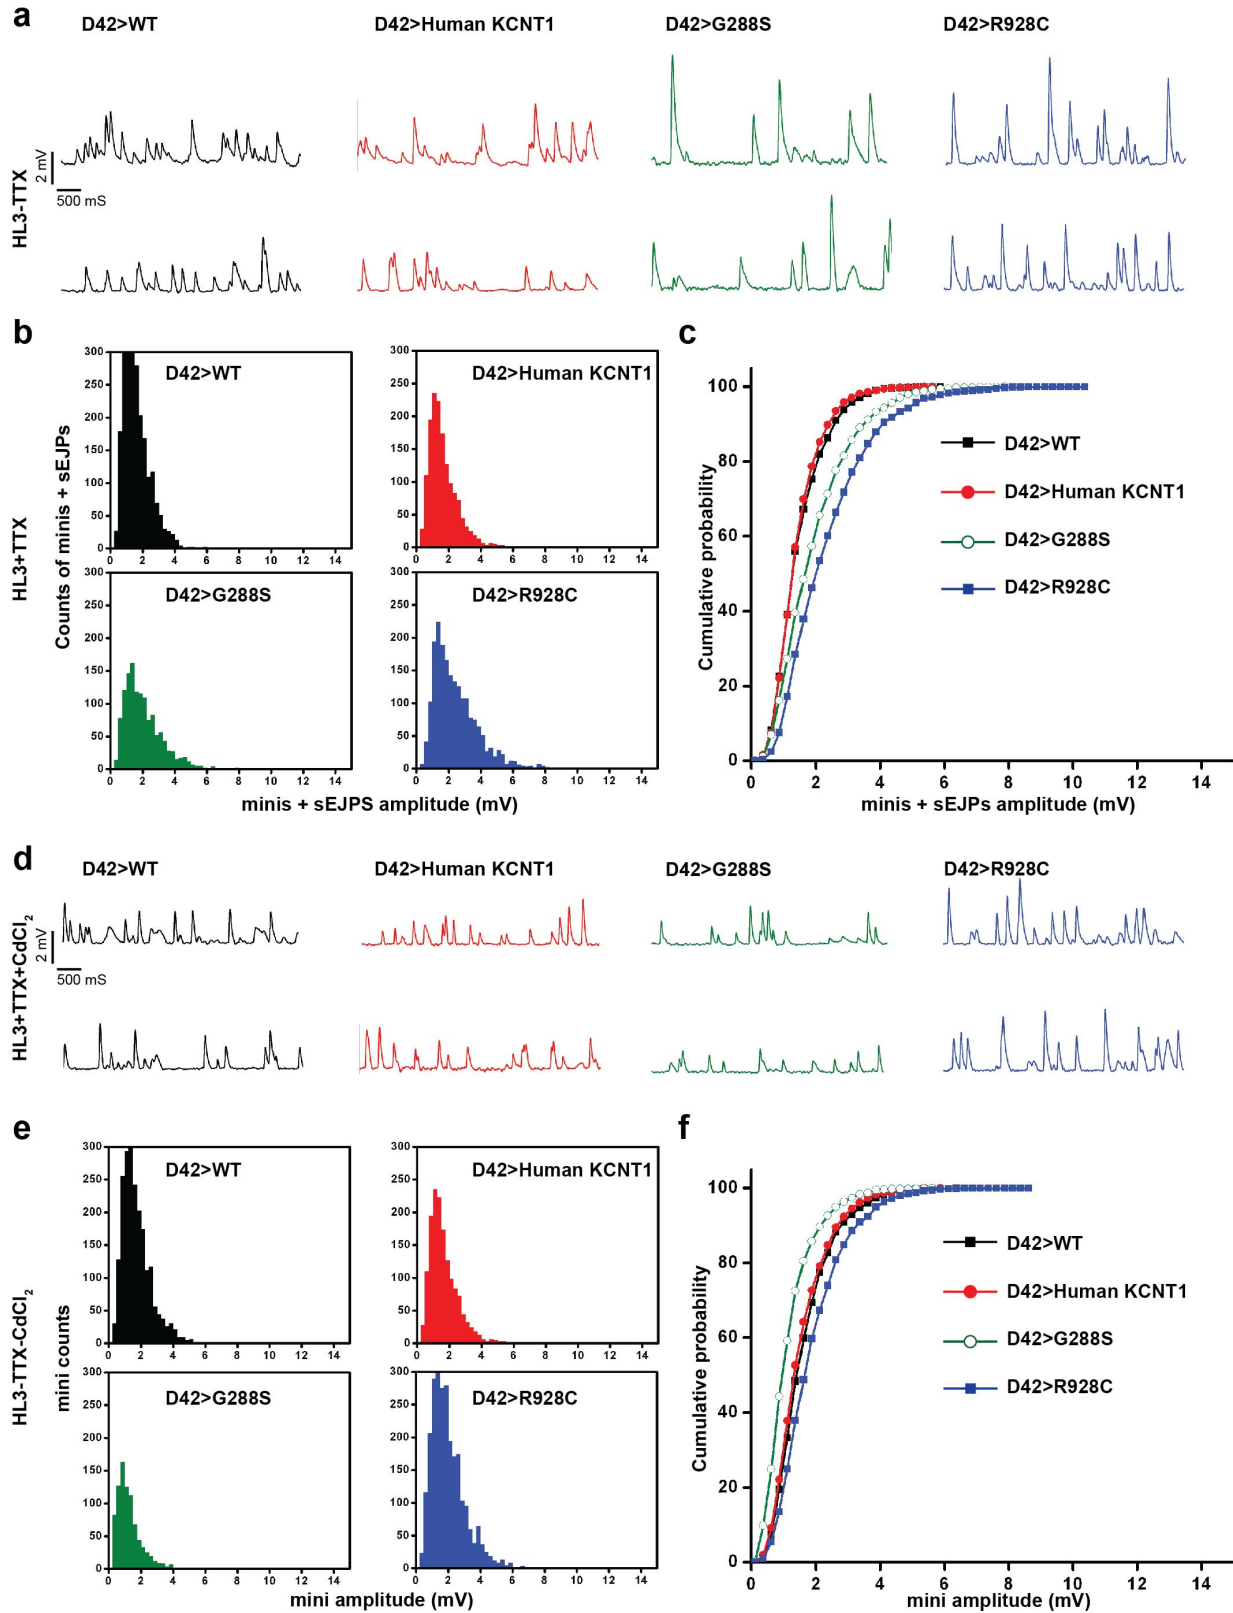



259

**Figure 4: Blocking both voltage-gated sodium and calcium channels in larvae expressing mutant hKCNT1 channels eliminated the spontaneous EJPs.**

(a) Representative traces of spontaneous synaptic potentials (minis + sEJPs) treated with voltage-gated sodium channel blocker TTX (1  $\mu$ M) in HL-3 saline. Note that the large sEJPs persist in TTX-saline. (b and c) Histograms and cumulative probability plots show that the extremely large sEJPs (>10 mV) are blocked by TTX but TTX does not eliminate all sEJPs. (d) Representative traces of spontaneous synaptic potentials (minis + sEJPs) treated with both voltage-gated Na<sup>+</sup> channel blocker TTX (1  $\mu$ M) and voltage-gated K<sup>+</sup> channel blocker CdCl<sub>2</sub> (10  $\mu$ M) in HL-3 saline (This treatment successfully reduces or abolishes the occurrence of spontaneous EJPs. (e and f) Histograms and cumulative probability plots show similar distributions of spontaneous synaptic potentials in TTX and Cd<sup>2+</sup>-treated larval NMJs. Recordings were taken from muscle 6 segment A3 or A4 and all larvae were reared at 22 °C for 5 days and 2 days at 25 °C prior to mini recordings. A total of ten recordings (two per larva) were made per genotype.

260

261 **Immunocytochemistry reveals compensatory decreases in endogenous K<sup>+</sup>**  
262 **channels in larvae expressing mutant KCNT1**

263 Our behavioral, imaging, and electrophysiological studies collectively suggest  
264 that mutant KCNT1 channels trigger compensatory mechanisms by which other ion  
265 channels are down or up regulated to counter balance the silencing effect of KCNT1 K<sup>+</sup>  
266 channels. In other words, the large increase in K<sup>+</sup> currents through mutant KCNT1  
267 channels has the potential to fully or partially silence neurons, like Kir2.1 does, to  
268 reduce the possibility of firing and impair synaptic transmission. In contrast, the  
269 motoneurons appear to fire normally (albeit not synchronized) and the EJP amplitude is  
270 largely unchanged. What enables the motoneurons to fire action potentials and the  
271 synaptic terminal to produce local and spontaneous auto-depolarization? We  
272 hypothesize that there is a compensatory change of excitability at both cell bodies and  
273 axons to ensure that action potentials can be produced and propagated. Furthermore,  
274 we hypothesize that there is a local compensation at the NMJ to enhance synaptic

275 activity. We used antibodies specific to Shaker (Sh) to stain the CNS and the  
276 neuromuscular preparation of larvae and showed that Shaker channels are reduced in  
277 levels (Fig. 5a,b).

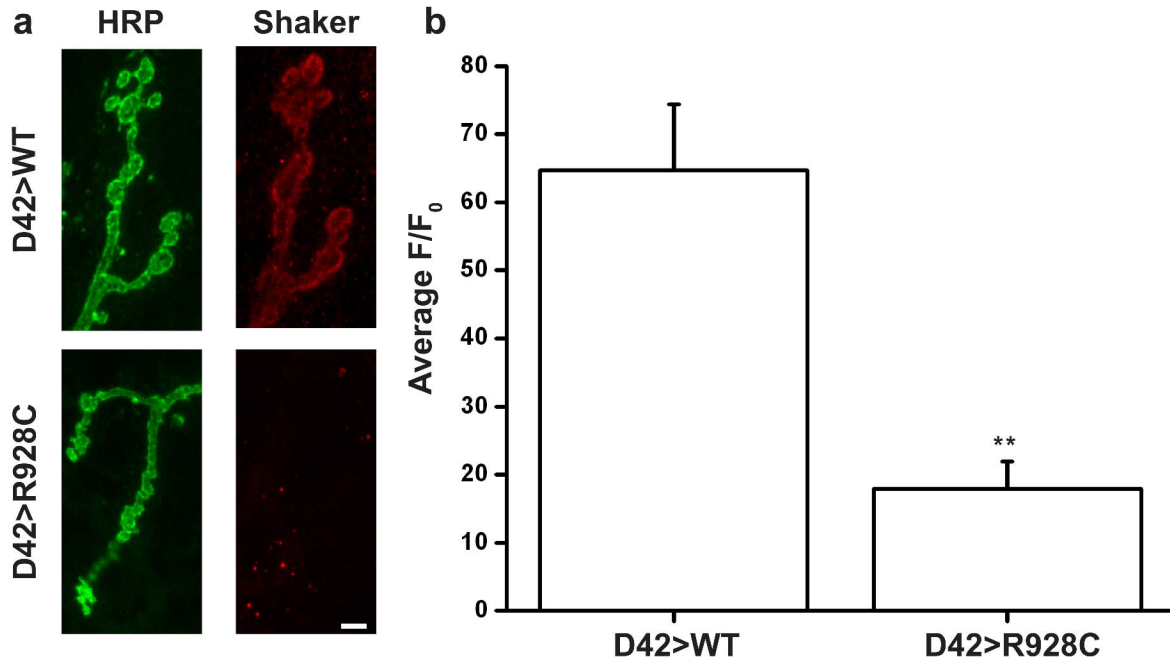

278

279

280

**Figure 5: Neuronal expression of mutant hKCNT1 channel leads to significant reduction in Shaker channels staining at the NMJ.**

(a) Representative NMJ confocal images of WT and larvae expressing mutant hKCNT1 channel in motoneurons. Larvae expressing mutant hKCNT1 channel show weak or no Shaker staining. Scale = 5  $\mu$ M. (b) Quantification of Shaker staining intensity show that Larvae expressing mutant hKCNT1 channel have a significant reduction in Shaker signal compared to control. \*\* $P < 0.01$ , Student's *T* test.

281

## 282 Discussion

283 The discovery of the link between mutant KCNT1 and epilepsy is important but it  
284 also presents challenges understanding the role of the K<sup>+</sup> channel in epileptogenesis. *In*  
285 *vitro* studies to date all show that mutant KCNT1 channels significantly increases K<sup>+</sup>

286 current magnitude<sup>9,11,12,19</sup>. It is easier to understand why mutations enhancing Na<sup>+</sup> and  
287 Ca<sup>2+</sup> channel activities or reducing K<sup>+</sup> channel activities can cause hyperexcitability and  
288 increase the probability for seizures or epilepsy. Similarly, mutant Cl<sup>-</sup> channels in  
289 skeletal muscles both in the fainting goat and humans cause myotonia<sup>47-49</sup>.  
290 Neurophysiologically speaking, enhancing K<sup>+</sup> currents is expected to hyperpolarize the  
291 resting potential or truncate action potentials and thereby reducing the possibility for  
292 neuronal firing. What then accounts for the neuropathology in KCNT1-associated  
293 epilepsy?

294 Two different hypotheses have been proposed to explain why enhanced K<sup>+</sup>  
295 channel activities in mutant KCNT1 could cause hyperexcitability and generate  
296 conditions in favor of seizures. One hypothesis, which we name 'repolarization  
297 hypothesis', states that following Na<sup>+</sup> influx the activation of KCNT1 K<sup>+</sup> channels  
298 shortens the duration of APs by repolarizing it at a faster rate. This in turn enables the  
299 neuron to fire more APs per unit time, resulting in hyperexcitability. This possibility is  
300 plausible, as shown in electrocytes of some electrical fish<sup>20</sup> and BK channel and  $\beta$   
301 subunit -linked epilepsy<sup>50-52</sup>. However, it will depend on the mode by which Na<sup>+</sup>  
302 activates KCNT1 channels and the kinetics of the K<sub>(Na)</sub> current<sup>53</sup>. KCNT1 channels are  
303 unique in that is activated by intracellular Na<sup>+</sup> and Cl<sup>-</sup>. Salkof and colleagues showed  
304 that activation of KCNT1 channels does not need high intracellular [Na<sup>+</sup>]<sub>i</sub><sup>54</sup>, implying that  
305 KCNT1 may also be important for contributing to resting potential as well as repolarizing  
306 AP. Furthermore, K<sub>(Na)</sub> following Na<sup>+</sup> influx could outlast the duration of an AP,  
307 especially during afterhyperpolarization period, and therefore prevent or delay the onset  
308 of the next AP. Finally, genetic studies of KCNT1 KO in mice showed that AP

309 repolarization is faster and neurons fire more APs<sup>24</sup>. This *in vivo* study indicates that the  
310 presence of KCNT1 K current normally hinders excitability or silence neurons. Our data  
311 obtained from muscle expression of the mutant KCNT1 provide strong evidence that the  
312 mutant KCNT1 channels are similar to inward rectifier K<sup>+</sup> channel 2.1 in reducing the  
313 muscle input resistance and hyperpolarizing the muscle resting potential. Further,  
314 neuronal expression of the mutant KCNT1 at high levels causes embryonic lethality or  
315 folded wings (Suppl Fig. 6) if the flies live to adult. These observations are consistent  
316 with the notion that mutant KCNT1 are gain of function mutations that silence both  
317 muscles and neurons. Hence, studies in both mice and fruit flies do not support the  
318 ‘repolarization hypothesis’.

319         The second hypothesis, which we call the ‘disinhibition hypothesis’<sup>19</sup>, postulates  
320 that the enhanced mutant KCNT1 K<sup>+</sup> current silences inhibitory neurons and thereby  
321 removing inhibition of neural circuits and tipping the balance towards hyperexcitability  
322 and seizures. This is an exciting hypothesis, but up to this point this hypothesis has not  
323 been directly tested. Our data showing that expression of mutant KCNT1 in GABAergic  
324 neurons induces seizures in adult flies lends a strong support to this hypothesis.

325         However, the disinhibition hypothesis alone may not be sufficient to account for  
326 the mutant KCNT1 actions in the nervous system. This is because KCNT1 is broadly  
327 expressed in a variety of neuronal types and regions in the human brain<sup>55,56</sup>. The broad  
328 and complex expression pattern of KCNT1 begs for additional mechanisms other than  
329 the disinhibition hypothesis to account for the effect of mutant KCNT1 in other neurons.  
330 By expressing the mutant KCNT1 in motoneurons we have learned that these neurons  
331 can be silenced if the expression levels are high or become hyperexcited if the

332 expression levels are low. When specifically expressed in adult motoneurons, mutant  
333 KCNT1 also causes bang-induced seizures, suggesting that these neurons are not  
334 silenced. This is consistent with the observations of normal EJPs and  $\text{Ca}^{2+}$  peaks in  
335 motoneurons in larvae. More strikingly, we reveal novel changes at the synapse where  
336 local depolarization leads to spontaneous synaptic potentials, which is partially sensitive  
337 to TTX blockade and fully sensitive to  $\text{Cd}^{+}$ . At the NMJ, the major endogenous  $\text{K}^{+}$   
338 channel Shaker is significantly reduced in levels, and TTX can block some of the sEJPs,  
339 providing a molecular explanation for the enhanced excitability in motoneurons. Our  
340 finding of sEJPs is consistent with previous findings that sEJPs also occurred in flies  
341 with mutations in Shaker  $\text{K}^{+}$  channels<sup>57</sup>. Based on these observations, we propose a  
342 'compensatory plasticity hypothesis' as a novel mechanism to counterbalance the  
343 silencing effect of mutant KCNT1 currents as an additional means to produce neuronal  
344 hyperexcitability and seizures. This work adds to the growing list of examples of  
345 homeostatic regulation of neuronal excitability<sup>58</sup>, although in our KCNT1 fly model it fails  
346 to fully compensate to restore normal function. The disinhibition and compensatory  
347 mechanisms are complementary to each other, suggesting that mutant KCNT1  
348 channels likely have different effects on different neurons. Further studies are expected  
349 to pinpoint the regulatory mechanisms by which mutant KCNT1 regulates Sh,  $\text{Na}^{+}$  and  
350 perhaps ion channel gene expression or trafficking.

351

352

353

354

355 **Supplementary Figure legends**

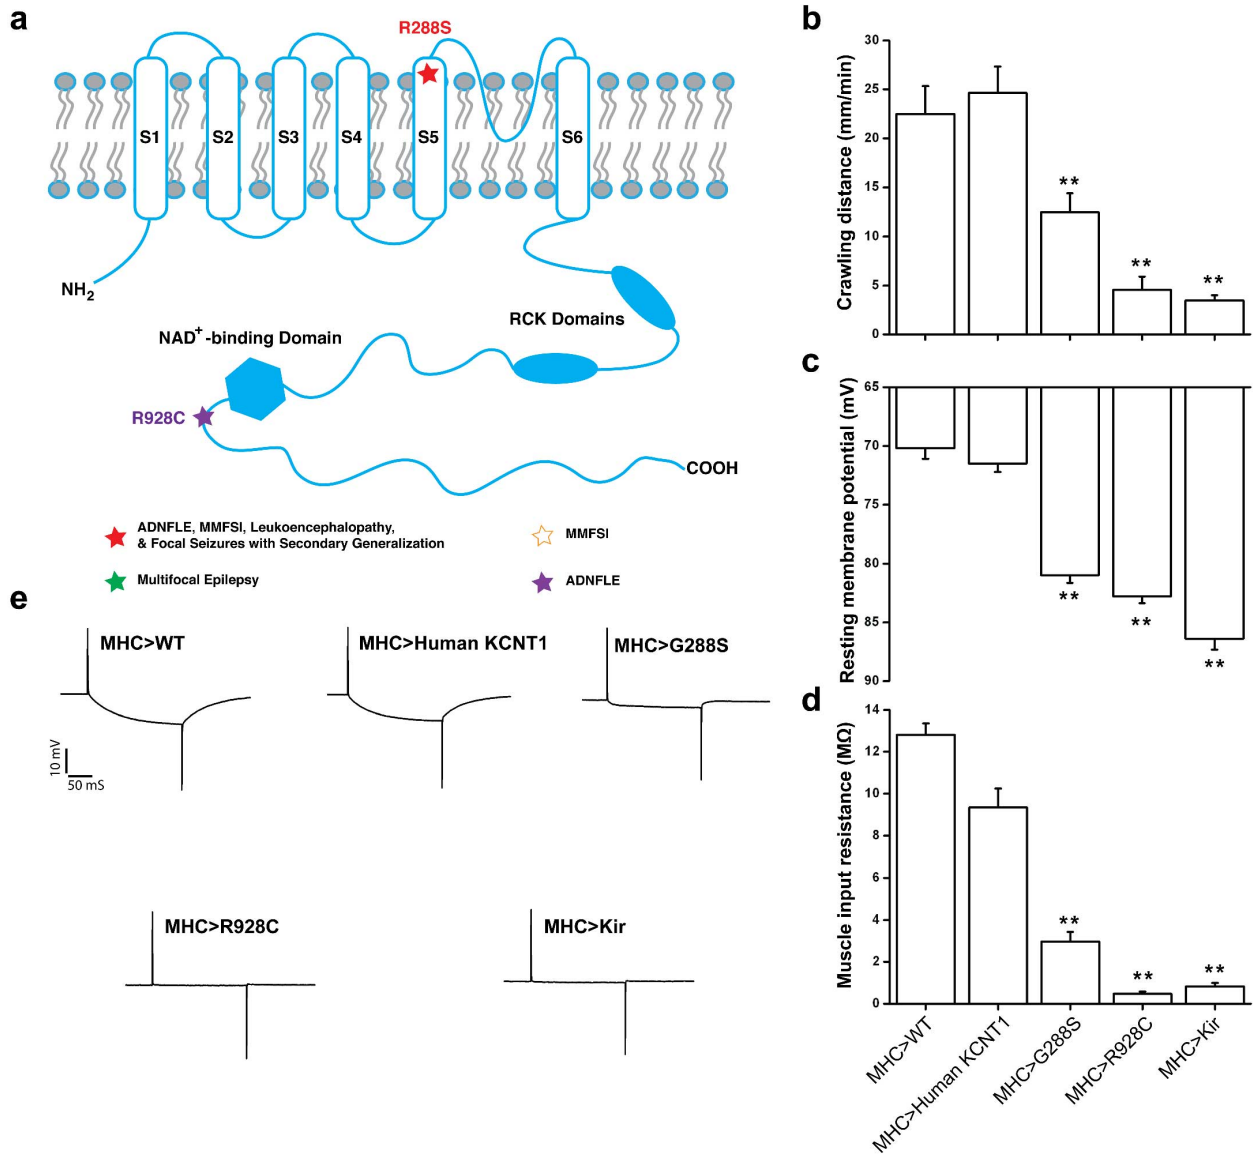

356

357 **Supplementary Figure 1: Muscle expression of mutant hKCNT1 protein in third-**  
 358 **instar larvae reduce crawling distance, membrane resting potential, and muscle**  
 359 **resistance.**

360 (a) Schematic diagram of human KCNT1 protein showing protein structure, location of

361 the mutations studied in this paper, and type of epilepsy syndrome caused by these

362 mutations. (b) Third-instar larvae expressing either mutant *hKCNT1* or *Kir2.1* in muscles

363 show a significant reduction in average crawling distance compare to controls. At least  
364 twenty larvae were used per genotype (10 males and 10 females). (**c** and **d**) In addition,  
365 overexpression of mutant KCNT1 channels significantly hyperpolarized the average  
366 resting membrane potential (**c**) and average muscle input resistance (**d**). (**e**)  
367 Representative traces for muscle input resistance in control and experimental larvae.  
368 Note the dramatic and similar reduction in muscle input resistance in both *MHC>R982C*  
369 and *MHC>Kir2.1* larvae. Muscle 6 of abdominal segment 3 or 4 was used for assisting  
370 the resting membrane potential and muscle input resistance. Ten larvae were used per  
371 genotype. All larvae were kept at 25 °C until the time of testing. Error bars show S.E.M.  
372 **\*\*P** < 0.01, one-way ANOVA, Turkey HSD *post hoc test*.

373

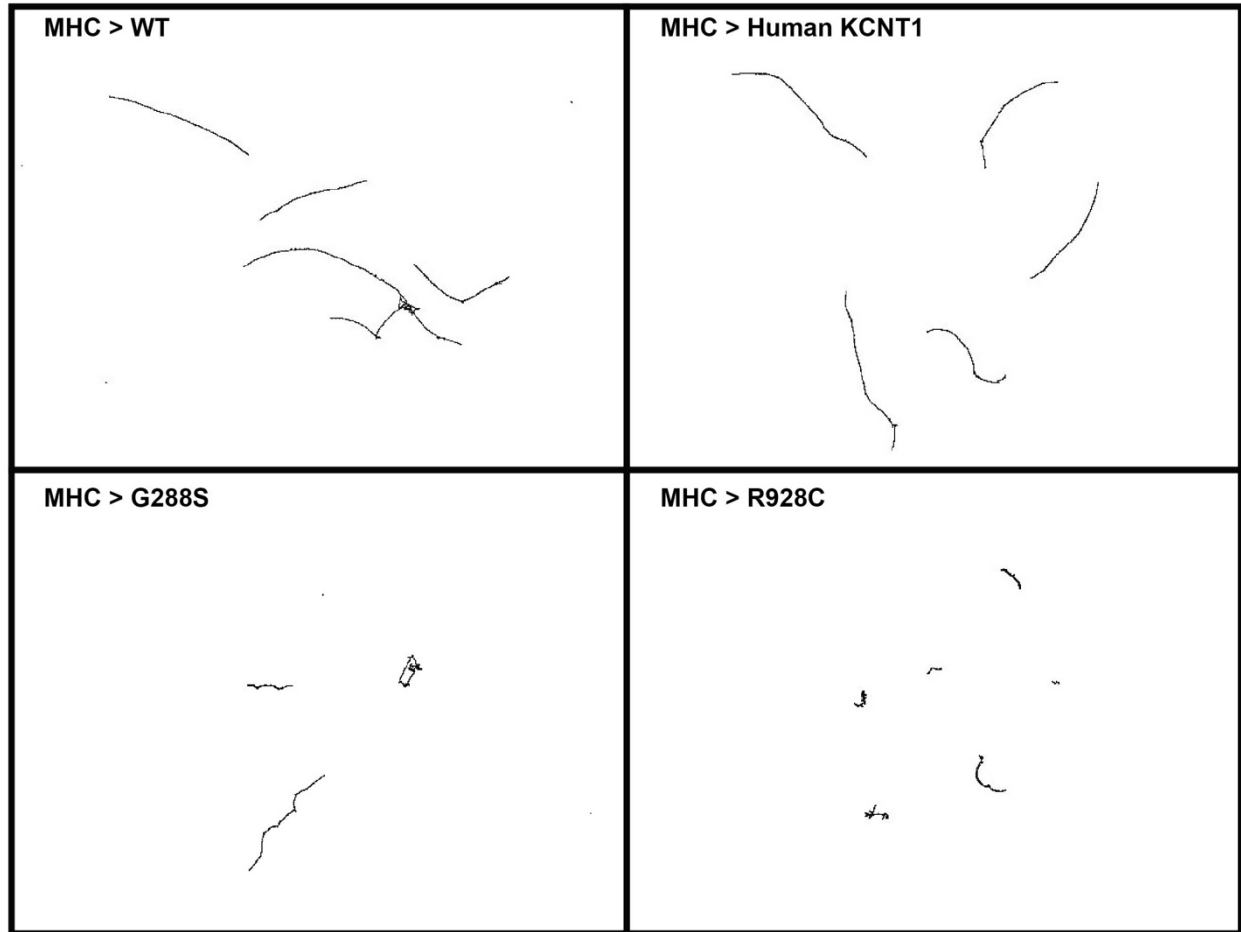

374

375 **Supplementary Figure 2: Representative larvae crawling tracks.** Larvae expressing

376 mutant hKCNT1 channels in muscles show significant reduction in crawling distance

377 compared to controls.

378



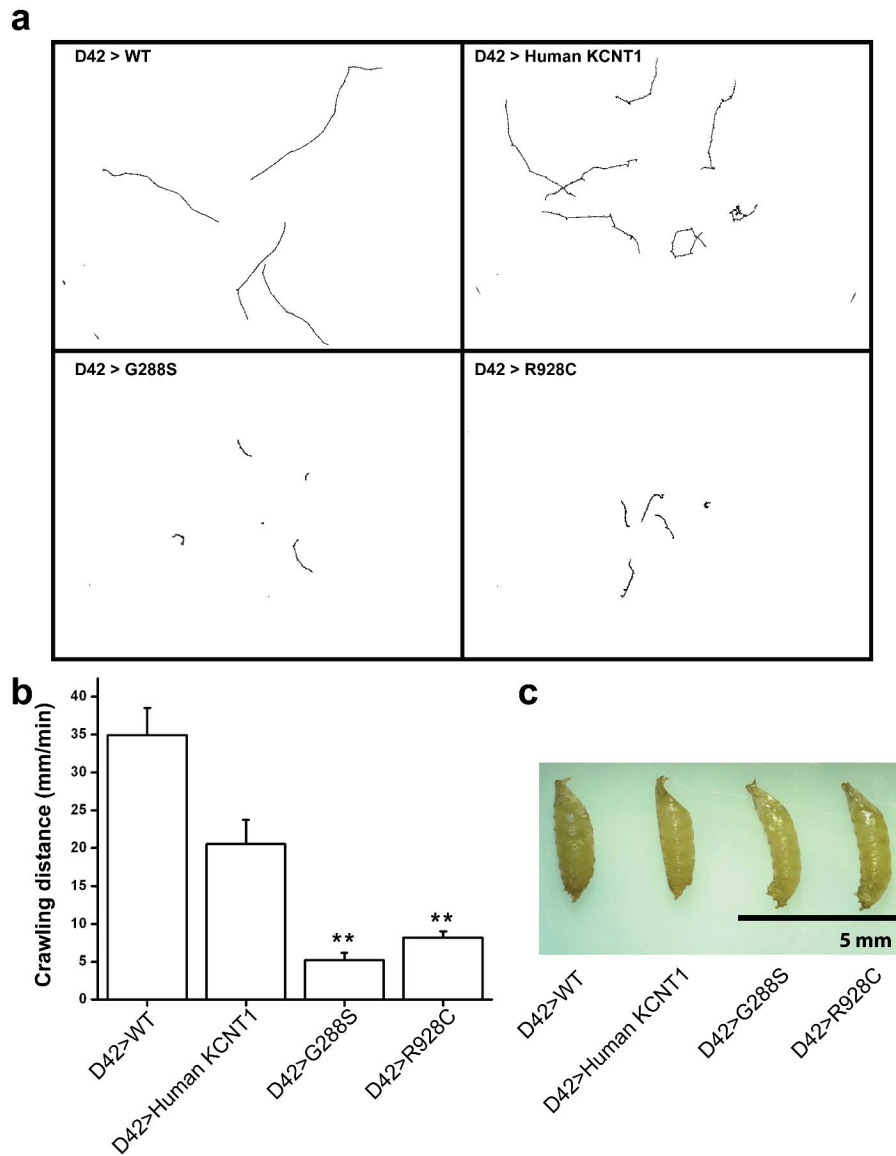

379

380 **Supplementary Figure 3: Motor neuronal expression of mutant hKCNT1 channels**  
381 **alter pupal and adult wings morphology and reduces third-instar larval crawling**  
382 **activity.**

383 (a) Representative larvae crawling tracks. (b). (c) Motor neuron expression of mutant  
384 hKCNT1 channels significantly reduce average crawling distance compare to controls.

385 (c) Representative images of pupal morphology. Larvae expressing mutant hKCNT1  
386 channels show bent pupa shape. At least twenty larvae were used per genotype (10

387 males and 10 females). All larvae were reared at 22 °C for 5 days then at 25 C° for 2  
388 days. Error bars show S.E.M. **\*\*P < 0.01** one-way ANOVA, Turkey HSD *post hoc test*.  
389

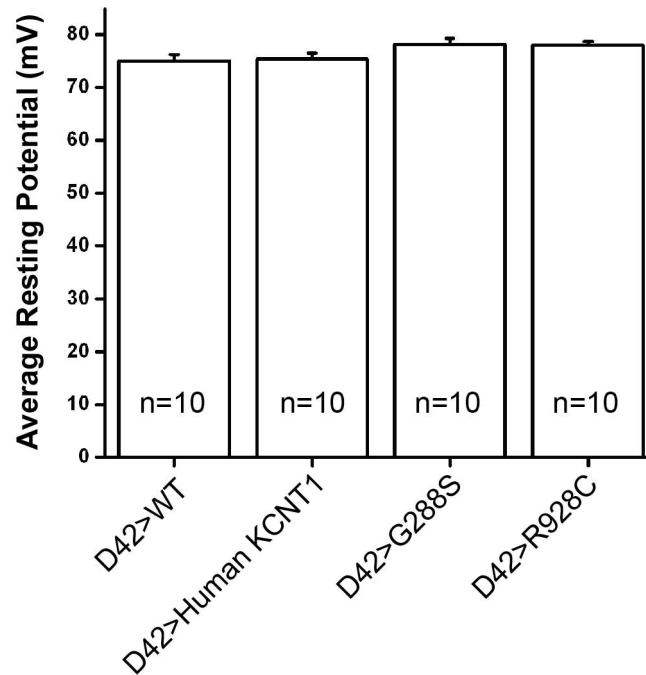

390

391 **Supplementary Figure 4: Motoneuronal expression of mutant hKCNT1 channels**

392 **did not affect membrane resting potential.** Both controls and larvae expressing  
393 mutant hKCNT1 channels in motoneurons have similar membrane resting potentials.

394

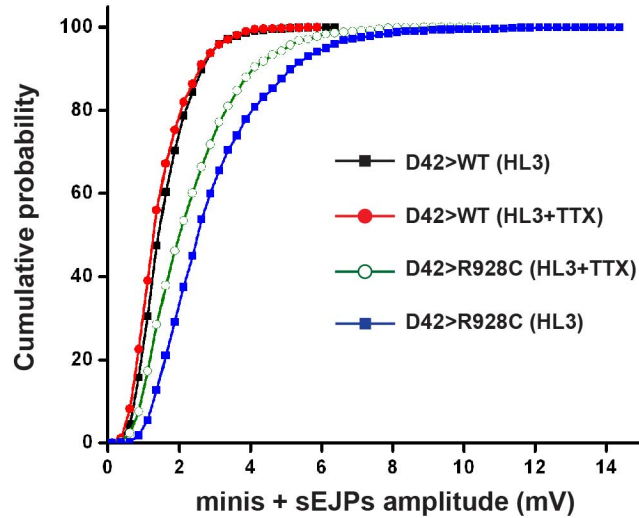

395

396 **Supplementary Figure 5: Blocking voltage-gated Na<sup>+</sup> channels with TTX reduced**  
397 **the number of extremely large sEJPs but did not abolish sEJPs in larvae**

398 **expressing mutant hKCNT1 channels.** Cumulative probability plot of minis plus sEJPs  
399 shows that TTX reduced the number of the extremely large sEJPs (>10 mV), but did not  
400 eliminate the sEJPs.

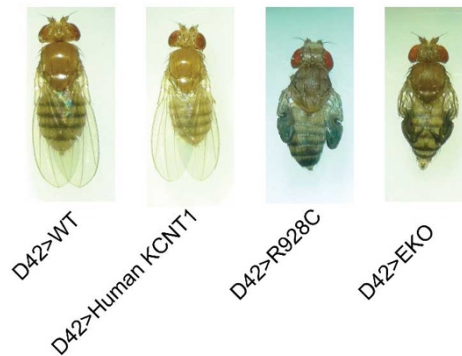

401

402

403 **Supplementary Figure 6: neuronal expression of the mutant KCNT1 Channels**

404 **causes folded wing phenotype.** Representative images of adult fly wing morphology.

405 All larvae were reared at 18 °C until eclosion.

406

407 **Supplementary Movie legends**

408 **Movie 1: Muscle expression of mutant hKCNT1 channels hinders larvae crawling**

409 **activity.** Representative crawling activity assay videos of controls and mutant KCNT1

410 larvae. Larvae expressing mutant hKCNT1 channels in muscle show significant

411 reduction in crawling activity compared to controls. Twenty larvae (ten males and ten

412 females) were used per genotype, and all larvae were aged at 25 °C prior to testing.

413

414 **Movie 2: GABAergic expression of mutant hKCNT1 channels increase the number**

415 **of seizing flies and seizing duration in adult flies.** Representative bang-sensitivity

416 behavioral assay videos. Flies expressing mutant hKCNT1 channels in inhibitory

417 neurons exhibit seizure phenotypes, such as spinning in the bottom of the vial or flip on

418 their back and remain at that state for one second or more. At least 40 flies were used

419 per genotype, and all larvae were aged at 18 °C until they enclosed then adult flies are

420 aged at 25 °C prior to testing.

421

422 **Movie 3: Motoneuronal expression of mutant hKCNT1 channels increase the**

423 **number of seizing flies and seizing duration in adult flies.** Representative bang-

424 sensitivity behavioral assay videos. Flies expressing mutant hKCNT1 channels in

425 motoneurons exhibit seizure phenotypes, such as spinning in the bottom of the vial or

426 flip on their back and remain at that state for one second or more. 120 flies were used

427 per genotype, and all larvae were aged at 18 °C until they enclosed then adult flies are

428 aged at 25 °C prior to testing.

429

430 **Movie 4: Larvae expressing mutant hKCNT1 channels in motoneurons shows**  
431 **uncoordinated contraction of left and right abdominal muscle hemisegments.**

432 Representative crawling activity assay videos of controls and mutant KCNT1 larvae.  
433 Larvae expressing mutant hKCNT1 channels in motoneurons show significant reduction  
434 in crawling activity compared to controls, due to unsynchronized muscle contractions.  
435 Twenty larvae (ten males and ten females) were used per genotype, and all larvae were  
436 aged at 22 °C for 5 days and at 25 °C for two days prior to testing.

437

438 **Movie 5: Ca<sup>2+</sup> waves in larvae expressing mutant hKCNT1 channels in**  
439 **motoneurons shows uncoordinated VNC abdominal ganglia firing.** Representative

440 Ca<sup>2+</sup> waves assay videos of controls and mutant hKCNT1 larvae. Larvae expressing  
441 mutant KCNT1 channels in motoneurons show significant increase in unsynchronized  
442 abdominal ganglia firing. Ca<sup>2+</sup> waves recording was at 2 frames per second and movie  
443 is showing 4X the original speed. Four larvae were used per genotype, and all larvae  
444 were aged at 22 °C for 5 days and at 25 °C for two days prior to testing.

445

446

447 **Methods**

448 **Fly Strains.**

449 Fly cultures kept at 12-h light/dark cycle on standard cornmeal food. The following  
450 *Drosophila* strains were used: *D42-GAL4*, *GAD1-GAL4*, *GAL80<sup>ts</sup>*, *Mhc-GAL4*, 8622, and  
451 *UAS-GCaMP6S* were obtained from Bloomington Stock Center. *UAS-Kir2.1* was gift  
452 from G. Davis, *UAS-EKOX2*, gift from B. White, and *UAS-KCNT1* transgenic lines, gift  
453 from L. Dibbens.

454

455 **Larvae crawling behavior assay and analysis.**

456 Wandering third-instar larvae were washed with double distilled water and placed on  
457 150mm petri dish containing 1% agarose. The larvae locomotion behavior was recorded  
458 for 1 min at 30 frames/s by Fujinon DF6HA-1B camera and FlyCapture software. Videos  
459 were analyzed using ImagJ and wrMTrck plugin as previously described<sup>59</sup>.

460

461 **Calcium imaging.**

462 Third-instar larvae were dissected and ventral nerve cord, which contains motoneurons,  
463 was viewed using Olympus BX61 compound microscope with 10X air lens. Calcium  
464 waves were recorded using ORCA-R<sup>2</sup> CCD camera (Hamamatsu) and CellSens  
465 Dimension 1.9 software. ImageJ software was used for calcium waves analysis.

466

467 **Electrophysiology**

468 Recordings were made from muscle 6 in abdominal segments 3 and 4 from third-instar  
469 larvae as previously described<sup>35,36</sup>. Recordings were made with a modified HL3 saline<sup>60</sup>

470 containing 70mM NaCl, 5mM KCl, 10mM MgCl<sub>2</sub>, 10mM NaHCO<sub>3</sub>, 5mM trehalose,  
471 115mM sucrose, 5mM HEPES, and 1.2mM CaCl<sub>2</sub>. For true mini was recorded with HL3  
472 solution plus 1 μM TTX and 10 μM CdCl<sub>2</sub>. Recording microelectrodes were fabricated  
473 using P2000g puller (Sutter instruments) and filled with 3M KCl. Signals were recorded  
474 by Axoclamp B2 amplifier and pCLAMP 6 software (Molecular devices). Severed  
475 segmental nerve was sucked by stimulation microelectrode and stimulated by Master-8  
476 pulse generator and iso-flex stimulus isolator (A.M.P.I.).

477

#### 478 **Fly bang-sensitive assay**

479 Experiment was done as previously described with some modification<sup>29,30</sup>. Briefly, flies  
480 were collected immediately after eclosion, kept at 25 °C, and mechanically stimulated  
481 with mini vortexer (VWR Scientific Products) at power setting 10. Flies behavior was  
482 recorded by SONY (HDR-SR11) camcorder. Flies that flipped on their back and  
483 remained at that position for at least one second were considered to be exhibiting  
484 seizure activity.

485

#### 486 **Immunocytochemistry.**

487 Wandering third-instar larvae were dissected in HL3 solution and fixed for 2h in  
488 4%paraformaldehyde. Fixed larvae were washed 3X 15 min each with PBST (0.2  
489 TritonX-100). Larvae were incubated overnight at 4 °C with primary antibody with the  
490 appropriate dilution. The following antibodies were used: guinea pig anti-Shaker 1:500  
491 (gift from Kyunghye Koh), rabbit HRP-488 1:500. Alexa-conjugated secondary

492 antibodies (1:500) were used. Images were acquired with Leica SP2 confocal  
493 microscope using a 63X oil immersion objective.

494

495 **Statistical analysis.**

496 Data were analyzed as described in the figure legends using Origin software version  
497 6.0.

498

499



## 500 **References**

- 501 1 Cain, S. M. & Snutch, T. P. in *Jasper's Basic Mechanisms of the Epilepsies* (eds J. L.  
502 Noebels *et al.*) (2012).
- 503 2 Catterall, W. A. in *Jasper's Basic Mechanisms of the Epilepsies* (eds J. L. Noebels *et al.*)  
504 (2012).
- 505 3 Cooper, E. C. in *Jasper's Basic Mechanisms of the Epilepsies* (eds J. L. Noebels *et al.*)  
506 (2012).
- 507 4 Yuan, A. *et al.* The sodium-activated potassium channel is encoded by a member of the  
508 Slo gene family. *Neuron* **37**, 765-773 (2003).
- 509 5 Bhattacharjee, A. & Kaczmarek, L. K. For K<sup>+</sup> channels, Na<sup>+</sup> is the new Ca<sup>2+</sup>. *Trends*  
510 *Neurosci* **28**, 422-428, doi:10.1016/j.tins.2005.06.003 (2005).
- 511 6 Kim, G. E. & Kaczmarek, L. K. Emerging role of the KCNT1 Slack channel in intellectual  
512 disability. *Front Cell Neurosci* **8**, 209, doi:10.3389/fncel.2014.00209 (2014).
- 513 7 Villa, C. & Combi, R. Potassium Channels and Human Epileptic Phenotypes: An Updated  
514 Overview. *Front Cell Neurosci* **10**, 81, doi:10.3389/fncel.2016.00081 (2016).
- 515 8 Joiner, W. J. *et al.* Formation of intermediate-conductance calcium-activated potassium  
516 channels by interaction of Slack and Slo subunits. *Nat Neurosci* **1**, 462-469,  
517 doi:10.1038/2176 (1998).
- 518 9 Barcia, G. *et al.* De novo gain-of-function KCNT1 channel mutations cause malignant  
519 migrating partial seizures of infancy. *Nat Genet* **44**, 1255-1259, doi:10.1038/ng.2441  
520 (2012).

- 521 10 Heron, S. E. *et al.* Missense mutations in the sodium-gated potassium channel gene  
522 KCNT1 cause severe autosomal dominant nocturnal frontal lobe epilepsy. *Nat Genet* **44**,  
523 1188-1190, doi:10.1038/ng.2440 (2012).
- 524 11 Kim, G. E. *et al.* Human slack potassium channel mutations increase positive  
525 cooperativity between individual channels. *Cell Rep* **9**, 1661-1672,  
526 doi:10.1016/j.celrep.2014.11.015 (2014).
- 527 12 Martin, H. C. *et al.* Clinical whole-genome sequencing in severe early-onset epilepsy  
528 reveals new genes and improves molecular diagnosis. *Hum Mol Genet* **23**, 3200-3211,  
529 doi:10.1093/hmg/ddu030 (2014).
- 530 13 Moller, R. S. *et al.* Mutations in KCNT1 cause a spectrum of focal epilepsies. *Epilepsia* **56**,  
531 e114-120, doi:10.1111/epi.13071 (2015).
- 532 14 Vanderver, A. *et al.* Identification of a novel de novo p.Phe932Ile KCNT1 mutation in a  
533 patient with leukoencephalopathy and severe epilepsy. *Pediatr Neurol* **50**, 112-114,  
534 doi:10.1016/j.pediatrneurol.2013.06.024 (2014).
- 535 15 Lim, C. X., Ricos, M. G., Dibbens, L. M. & Heron, S. E. KCNT1 mutations in seizure  
536 disorders: the phenotypic spectrum and functional effects. *J Med Genet* **53**, 217-225,  
537 doi:10.1136/jmedgenet-2015-103508 (2016).
- 538 16 Bearden, D. *et al.* Targeted treatment of migrating partial seizures of infancy with  
539 quinidine. *Ann Neurol* **76**, 457-461, doi:10.1002/ana.24229 (2014).
- 540 17 Fukuoka, M. *et al.* Quinidine therapy for West syndrome with KCNT1 mutation: A case  
541 report. *Brain Dev* **39**, 80-83, doi:10.1016/j.braindev.2016.08.002 (2017).

- 542 18 Mikati, M. A. *et al.* Quinidine in the treatment of KCNT1-positive epilepsies. *Ann Neurol*  
543 **78**, 995-999, doi:10.1002/ana.24520 (2015).
- 544 19 Tang, Q. Y. *et al.* Epilepsy-Related Slack Channel Mutants Lead to Channel Over-Activity  
545 by Two Different Mechanisms. *Cell Rep* **14**, 129-139, doi:10.1016/j.celrep.2015.12.019  
546 (2016).
- 547 20 Markham, M. R., Kaczmarek, L. K. & Zakon, H. H. A sodium-activated potassium channel  
548 supports high-frequency firing and reduces energetic costs during rapid modulations of  
549 action potential amplitude. *J Neurophysiol* **109**, 1713-1723, doi:10.1152/jn.00875.2012  
550 (2013).
- 551 21 Franceschetti, S. *et al.* Na<sup>+</sup>-activated K<sup>+</sup> current contributes to postexcitatory  
552 hyperpolarization in neocortical intrinsically bursting neurons. *J Neurophysiol* **89**, 2101-  
553 2111, doi:10.1152/jn.00695.2002 (2003).
- 554 22 Yang, B., Desai, R. & Kaczmarek, L. K. Slack and Slick K(Na) channels regulate the  
555 accuracy of timing of auditory neurons. *J Neurosci* **27**, 2617-2627,  
556 doi:10.1523/JNEUROSCI.5308-06.2007 (2007).
- 557 23 Lu, R. *et al.* Slack channels expressed in sensory neurons control neuropathic pain in  
558 mice. *J Neurosci* **35**, 1125-1135, doi:10.1523/JNEUROSCI.2423-14.2015 (2015).
- 559 24 Martinez-Espinosa, P. L. *et al.* Knockout of Slo2.2 enhances itch, abolishes KNa current,  
560 and increases action potential firing frequency in DRG neurons. *Elife* **4**,  
561 doi:10.7554/eLife.10013 (2015).
- 562 25 Paradis, S., Sweeney, S. T. & Davis, G. W. Homeostatic control of presynaptic release is  
563 triggered by postsynaptic membrane depolarization. *Neuron* **30**, 737-749 (2001).

- 564 26 Pandey, U. B. & Nichols, C. D. Human disease models in *Drosophila melanogaster* and  
565 the role of the fly in therapeutic drug discovery. *Pharmacol Rev* **63**, 411-436,  
566 doi:10.1124/pr.110.003293 (2011).
- 567 27 Song, J. & Tanouye, M. A. From bench to drug: human seizure modeling using  
568 *Drosophila*. *Prog Neurobiol* **84**, 182-191, doi:10.1016/j.pneurobio.2007.10.006 (2008).
- 569 28 Stilwell, G. E., Saraswati, S., Littleton, J. T. & Chouinard, S. W. Development of a  
570 *Drosophila* seizure model for in vivo high-throughput drug screening. *Eur J Neurosci* **24**,  
571 2211-2222, doi:10.1111/j.1460-9568.2006.05075.x (2006).
- 572 29 Benzer, S. From the gene to behavior. *JAMA* **218**, 1015-1022 (1971).
- 573 30 Ganetzky, B. & Wu, C. F. Indirect Suppression Involving Behavioral Mutants with Altered  
574 Nerve Excitability in *DROSOPHILA MELANOGASTER*. *Genetics* **100**, 597-614 (1982).
- 575 31 Jackson, F. R., Newby, L. M. & Kulkarni, S. J. *Drosophila* GABAergic systems: sequence  
576 and expression of glutamic acid decarboxylase. *J Neurochem* **54**, 1068-1078 (1990).
- 577 32 Sanyal, S. Genomic mapping and expression patterns of C380, OK6 and D42 enhancer  
578 trap lines in the larval nervous system of *Drosophila*. *Gene Expr Patterns* **9**, 371-380,  
579 doi:10.1016/j.gep.2009.01.002 (2009).
- 580 33 Yeh, E., Gustafson, K. & Boulianne, G. L. Green fluorescent protein as a vital marker and  
581 reporter of gene expression in *Drosophila*. *Proc Natl Acad Sci U S A* **92**, 7036-7040  
582 (1995).
- 583 34 McGuire, S. E., Le, P. T., Osborn, A. J., Matsumoto, K. & Davis, R. L. Spatiotemporal  
584 rescue of memory dysfunction in *Drosophila*. *Science* **302**, 1765-1768,  
585 doi:10.1126/science.1089035 (2003).

- 586 35 Zhang, B. & Stewart, B. Electrophysiological recording from *Drosophila* larval body-wall  
587 muscles. *Cold Spring Harb Protoc* **2010**, pdb prot5487, doi:10.1101/pdb.prot5487  
588 (2010).
- 589 36 Jan, L. Y. & Jan, Y. N. Properties of the larval neuromuscular junction in *Drosophila*  
590 *melanogaster*. *J Physiol* **262**, 189-214 (1976).
- 591 37 Lemon, W. C. *et al.* Whole-central nervous system functional imaging in larval  
592 *Drosophila*. *Nat Commun* **6**, 7924, doi:10.1038/ncomms8924 (2015).
- 593 38 Streit, A. K., Fan, Y. N., Masullo, L. & Baines, R. A. Calcium Imaging of Neuronal Activity in  
594 *Drosophila* Can Identify Anticonvulsive Compounds. *PLoS One* **11**, e0148461,  
595 doi:10.1371/journal.pone.0148461 (2016).
- 596 39 Pulver, S. R. *et al.* Imaging fictive locomotor patterns in larval *Drosophila*. *J Neurophysiol*  
597 **114**, 2564-2577, doi:10.1152/jn.00731.2015 (2015).
- 598 40 Kohsaka, H., Okusawa, S., Itakura, Y., Fushiki, A. & Nose, A. Development of larval motor  
599 circuits in *Drosophila*. *Dev Growth Differ* **54**, 408-419, doi:10.1111/j.1440-  
600 169X.2012.01347.x (2012).
- 601 41 Frank, C. A., Kennedy, M. J., Goold, C. P., Marek, K. W. & Davis, G. W. Mechanisms  
602 underlying the rapid induction and sustained expression of synaptic homeostasis.  
603 *Neuron* **52**, 663-677, doi:10.1016/j.neuron.2006.09.029 (2006).
- 604 42 Gertner, D. M., Desai, S. & Lnenicka, G. A. Synaptic excitation is regulated by the  
605 postsynaptic dSK channel at the *Drosophila* larval NMJ. *J Neurophysiol* **111**, 2533-2543,  
606 doi:10.1152/jn.00903.2013 (2014).

- 607 43 Kombian, S. B., Hirasawa, M., Mougnot, D., Chen, X. & Pittman, Q. J. Short-term  
608 potentiation of miniature excitatory synaptic currents causes excitation of supraoptic  
609 neurons. *J Neurophysiol* **83**, 2542-2553 (2000).
- 610 44 Powers, A. S., Grizzaffi, J. & Lnenicka, G. A. Increased postsynaptic Ca<sup>2+</sup> reduces mini  
611 frequency at the *Drosophila* larval NMJ. *Synapse* **71**, doi:10.1002/syn.21971 (2017).
- 612 45 Sutton, M. A. *et al.* Miniature neurotransmission stabilizes synaptic function via tonic  
613 suppression of local dendritic protein synthesis. *Cell* **125**, 785-799,  
614 doi:10.1016/j.cell.2006.03.040 (2006).
- 615 46 Halabisky, B., Parada, I., Buckmaster, P. S. & Prince, D. A. Excitatory input onto hilar  
616 somatostatin interneurons is increased in a chronic model of epilepsy. *J Neurophysiol*  
617 **104**, 2214-2223, doi:10.1152/jn.00147.2010 (2010).
- 618 47 Beck, C. L., Fahlke, C. & George, A. L., Jr. Molecular basis for decreased muscle chloride  
619 conductance in the myotonic goat. *Proc Natl Acad Sci U S A* **93**, 11248-11252 (1996).
- 620 48 Meyer-Kleine, C., Steinmeyer, K., Ricker, K., Jentsch, T. J. & Koch, M. C. Spectrum of  
621 mutations in the major human skeletal muscle chloride channel gene (CLCN1) leading to  
622 myotonia. *Am J Hum Genet* **57**, 1325-1334 (1995).
- 623 49 Pusch, M. Myotonia caused by mutations in the muscle chloride channel gene CLCN1.  
624 *Hum Mutat* **19**, 423-434, doi:10.1002/humu.10063 (2002).
- 625 50 Du, W. *et al.* Calcium-sensitive potassium channelopathy in human epilepsy and  
626 paroxysmal movement disorder. *Nat Genet* **37**, 733-738, doi:10.1038/ng1585 (2005).

- 627 51 Yang, J. *et al.* An epilepsy/dyskinesia-associated mutation enhances BK channel  
628 activation by potentiating Ca<sup>2+</sup> sensing. *Neuron* **66**, 871-883,  
629 doi:10.1016/j.neuron.2010.05.009 (2010).
- 630 52 Brenner, R. *et al.* BK channel beta4 subunit reduces dentate gyrus excitability and  
631 protects against temporal lobe seizures. *Nat Neurosci* **8**, 1752-1759,  
632 doi:10.1038/nn1573 (2005).
- 633 53 Dryer, S. E. Na(+)-activated K<sup>+</sup> channels: a new family of large-conductance ion  
634 channels. *Trends Neurosci* **17**, 155-160 (1994).
- 635 54 Budelli, G. *et al.* Na<sup>+</sup>-activated K<sup>+</sup> channels express a large delayed outward current in  
636 neurons during normal physiology. *Nat Neurosci* **12**, 745-750, doi:10.1038/nn.2313  
637 (2009).
- 638 55 Bhattacharjee, A., Gan, L. & Kaczmarek, L. K. Localization of the Slack potassium channel  
639 in the rat central nervous system. *J Comp Neurol* **454**, 241-254, doi:10.1002/cne.10439  
640 (2002).
- 641 56 Rizzi, S., Knaus, H. G. & Schwarzer, C. Differential distribution of the sodium-activated  
642 potassium channels slick and slack in mouse brain. *J Comp Neurol* **524**, 2093-2116,  
643 doi:10.1002/cne.23934 (2016).
- 644 57 Ganetzky, B. & Wu, C. F. Neurogenetic analysis of potassium currents in *Drosophila*:  
645 synergistic effects on neuromuscular transmission in double mutants. *J Neurogenet* **1**,  
646 17-28 (1983).

647 58 Turrigiano, G. Homeostatic synaptic plasticity: local and global mechanisms for  
648 stabilizing neuronal function. *Cold Spring Harb Perspect Biol* **4**, a005736,  
649 doi:10.1101/cshperspect.a005736 (2012).

650 59 Brooks, D. S., Vishal, K., Kawakami, J., Bouyain, S. & Geisbrecht, E. R. Optimization of  
651 wrMTck to monitor Drosophila larval locomotor activity. *J Insect Physiol* **93-94**, 11-17,  
652 doi:10.1016/j.jinsphys.2016.07.007 (2016).

653 60 Frank, C. A., Pielage, J. & Davis, G. W. A presynaptic homeostatic signaling system  
654 composed of the Eph receptor, ephexin, Cdc42, and CaV2.1 calcium channels. *Neuron*  
655 **61**, 556-569, doi:10.1016/j.neuron.2008.12.028 (2009).

656

657



658 **Acknowledgements:** We thank an internal fund for supporting this line of research  
659 from the University of Missouri and Division of Biological Sciences and a postdoctoral  
660 fellowship from King Abdullah International Medical Research Center, Riyadh, Saudi  
661 Arabia for the support of SNE. We thank Kyunghee Koh for the gift of the Shaker  
662 antibody, Leanne Dibbens for sharing fly lines, Weijie Liu for her initial contributions to  
663 this project, and the members of the Zhang lab for helpful discussions.

664

665 **Author contributions:** SNE, GTD, BZ designed the experiments; DD helped design  
666 the molecular cloning of KCNT1 channels; SNE, GTD, PS, and BZ collected and  
667 analyzed data; SNE and BZ wrote the manuscript, GTD, SP, and DD revised or made  
668 comments on the manuscript.

669

670 **Competing financial interests:** This work described here has been filed for a  
671 provisional patent application.

672 **Materials & Correspondence:** zhangbing@missouri.edu
